# Supplementary material
Source: MDPI journal article supplement (https://www.mdpi.com/search?q=materials-12-01310)
Supplement: s001 [file materials-12-01310-s001.pdf]

# Supporting Online Material for

## Highly Active Au-Cu-based Catalysts for Acetylene Hydrochlorination Prepared by Organic Aqua Regia

Haihua He <sup>1,3</sup>, Jia Zhao <sup>1,\*</sup>, Bolin Wang <sup>1</sup>, Yuxue Yue <sup>1</sup>, Gangfeng Sheng <sup>1</sup>, Qingtao Wang <sup>1</sup>, Lu Yu <sup>1</sup>, Zhong-Ting Hu <sup>2</sup> and Xiaonian Li <sup>1,\*</sup>

<sup>1</sup> Industrial Catalysis Institute, Laboratory Breeding Base of Green Chemistry-Synthesis Technology, Zhejiang University of Technology, Hangzhou 310014, China.

<sup>2</sup> College of Environment, Zhejiang University of Technology, Hangzhou 310014, China.

<sup>3</sup> Pharmaceutical and Material Engineering School, Jin Hua Polytechnic, Jinhua 321007, China.

\* Correspondence: jiazhao@zjut.edu.cn (Jia zhao); xnli@zjut.edu.cn (Xiaonian Li); Tel.: +86 571 88320002.

**Table 1.** Catalytic performance of different Au-Cu-based catalysts.

| Catalysts                  | Temperature<br>°C | GHSV<br>h <sup>-1</sup> | Maximum<br>Conversion<br>% | Deactivation<br>Rate <sup>a</sup><br>h <sup>-1</sup> | Ref          |
|----------------------------|-------------------|-------------------------|----------------------------|------------------------------------------------------|--------------|
| Au-Cu/C                    | 170               | 1200                    | 72                         | 0.92                                                 | [1]          |
| Au-Cu/AC                   | 180               | 1200                    | 89                         | 6.75                                                 | [2]          |
| Au-Co(III)-Cu(II)/AC       | 150               | 360                     | 99                         | 0.08                                                 | [3]          |
| Au/TCCA/AC                 | 180               | 600                     | 90                         | 0.83                                                 | [4]          |
| 0.1Au1.0Cu/AC              | 150               | 120                     | 99                         | 24.6                                                 | [5]          |
| Au-Cu-SH/AC                | 180               | 1200                    | 75                         | 1.66                                                 | [6]          |
| AuCuCs/AC                  | 180               | 740                     | 89                         | 0.76                                                 | [7]          |
| Au-Cu-IL/AC                | 180               | 740                     | 75                         | -0.25                                                | [8]          |
| AuCu <sub>1</sub> /AC(OAR) | 180               | 1480                    | 80                         | 0.04                                                 | This<br>work |

<sup>a</sup> Deactivation rate (h<sup>-1</sup>) was calculated from  $(X_{\text{Maximum}} \% - X_{\text{Stop}}\%) / (T_{\text{Stop}} - T_{\text{Maximum}})$ . X represents for the acetylene conversion.

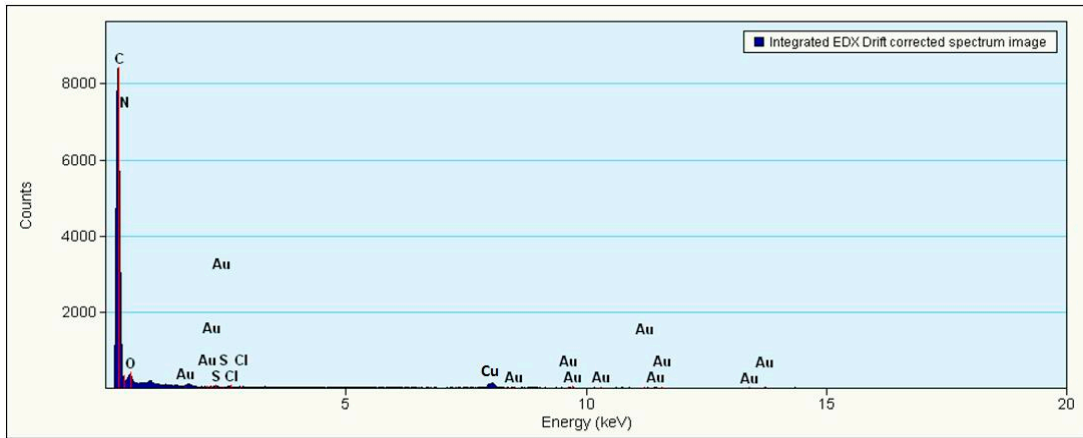

Figure 1. EDX spectra of fresh AuCu<sub>1</sub>/AC(OAR) catalyst.

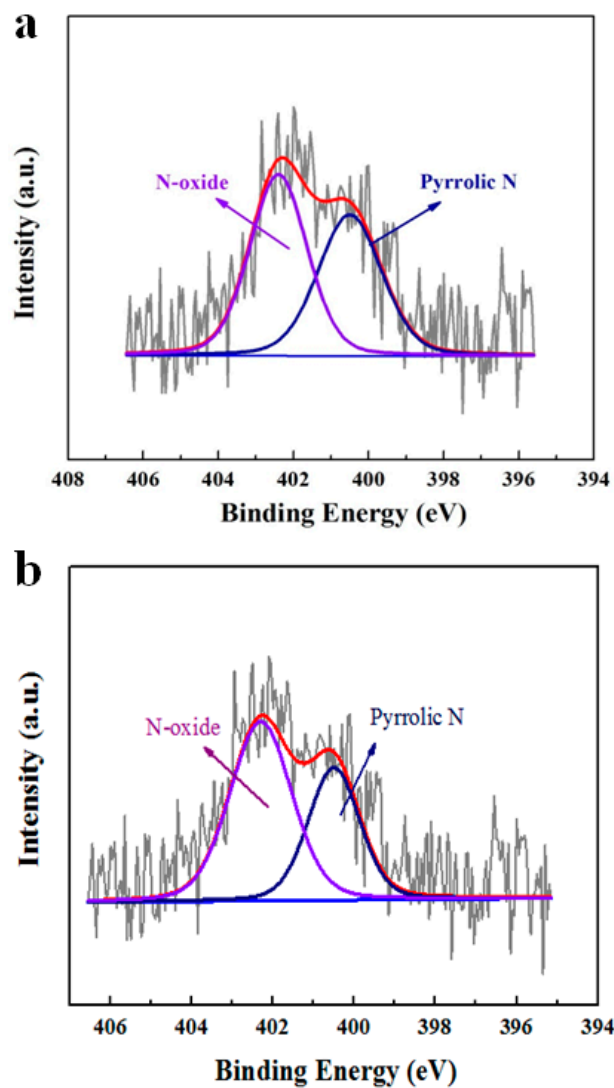

Figure 2. High-resolution N 1s spectra of the (a) fresh and (b) used AuCu<sub>1</sub>/AC(OAR) catalysts.

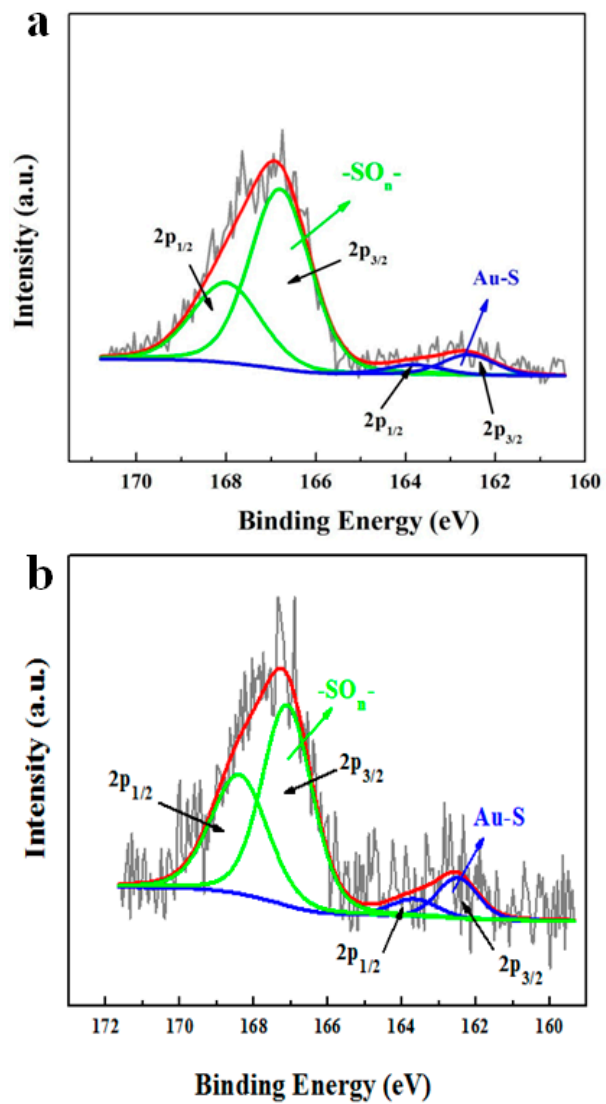

Figure 3. High-resolution S 2p spectra of the (a) fresh and (b) used AuCu<sub>1</sub>/AC(OAR) catalysts.

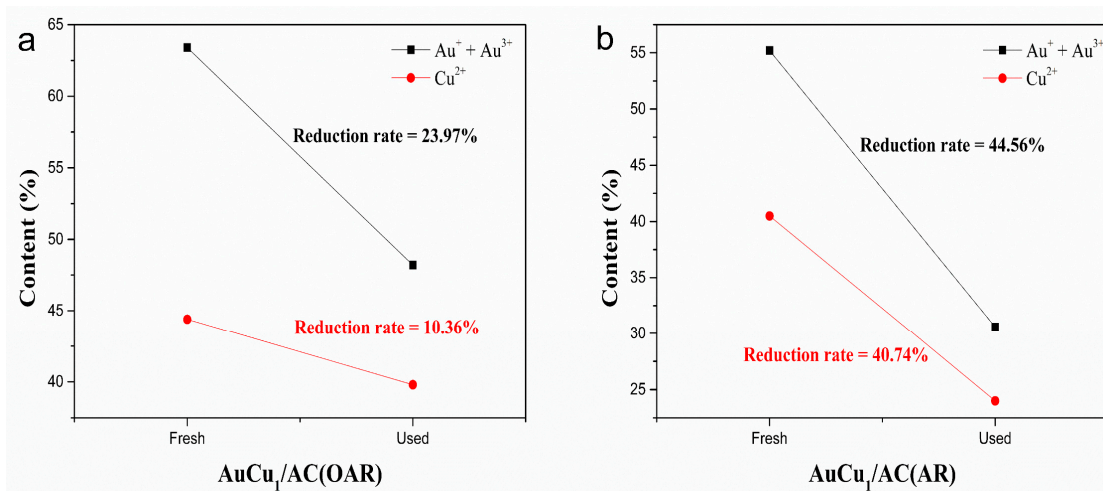

**Figure 4.** The reduction rate for cationic Au and Cu species: (a) AuCu<sub>1</sub>/AC(OAR) and (b) AuCu<sub>1</sub>/AC(AR) catalysts.

## References

1. Wang, S.; Shen, B.; Song, Q. Kinetics of Acetylene Hydrochlorination over Bimetallic Au–Cu/C Catalyst. *Catal. Lett.* **2010**, *134*, 102–109.
2. Zhou, K.; Jia, J.; Li, C.; Xu, H.; Zhou, J.; Luo, G.; Wei, F. A low content Au-based catalyst for hydrochlorination of C<sub>2</sub>H<sub>2</sub> and its industrial scale-up for future PVC processes. *Green Chem.* **2015**, *17*, 356–364.
3. Zhang, H.; Dai, B.; Li, W.; Wang, X.; Zhang, J.; Zhu, M.; Gu, J. Non-mercury catalytic acetylene hydrochlorination over spherical activated-carbon-supported Au–Co(III)–Cu(II) catalysts. *J. Catal.* **2014**, *316*, 141–148.
4. Xu, H.; Zhou, K.; Si, J.; Li, C.; Luo, G. A ligand coordination approach for high reaction stability of an Au–Cu bimetallic carbon-based catalyst in the acetylene hydrochlorination process. *Catal. Sci. Technol.* **2016**, *6*, 1357–1366.
5. Zhao, J.; Zeng, J.; Cheng, X.; Wang, L.; Yang, H.; Shen, B. An Au–Cu bimetal catalyst for acetylene hydrochlorination with renewable  $\gamma$ -Al<sub>2</sub>O<sub>3</sub> as the support. *RSC Adv.* **2015**, *5*, 16727–16734.
6. Hong, G.; Tian, X.; Jiang, B.; Liao, Z.; Wang, J.; Yang, Y.; Zheng, J. Improvement of performance of a Au–Cu/AC catalyst using thiol for acetylene hydrochlorination reaction. *RSC Adv.* **2016**, *6*, 3806–3814.
7. Zhao, J.; Gu, S.; Xu, X.; Zhang, T.; Di, X.; Pan, Z.; Li, X. Promotional effect of copper(ii) on an activated carbon supported low content bimetallic gold–cesium(i) catalyst in acetylene hydrochlorination. *RSC Adv.* **2015**, *5*, 101427–101436.
8. Zhao, J.; Yu, Y.; Xu, X.; Di, S.; Wang, B.; Xu, H.; Ni, J.; Guo, L.; Pan, Z.; Li, X. Stabilizing Au(III) in supported-ionic-liquid-phase (SILP) catalyst using CuCl<sub>2</sub> via a redox mechanism. *Appl. Catal. B Environ.* **2017**, *206*, 175–183.
